# Supplementary material for: High Current-Induced Electron Redistribution in a CVD-Grown Graphene Wide Constriction
Source: Hindawi journal article supplement (doi:10.1155/2016/1806871), 2016-01-01
Supplement: f1 [file 1806871.f1.zip]

Archive with 2 entries (2 files):
- High current-induced electron distribution in a CVD-grown graphene wide constriction.mp4
- mat.1806871.v2.docx
