# Supplementary material for: High Current-Induced Electron Redistribution in a CVD-Grown Graphene Wide Constriction
Source: Hindawi journal article supplement (doi:10.1155/2016/1806871), 2016-01-01
Supplement: f1 [file 1806871.f1.zip › mat.1806871.v2.docx]

**Supporting Information**

1. **Theoretical Approach**

The mean-field Gross-Pitaevskii equation describes a Fermi gas system when one takes into account the quantum potential arising from the Heisenberg uncertainty principle. This description goes beyond the Thomas-Fermi approximation and can be useful to regularize the dynamics at small scales. In the case of fermions, we must also take into account the quantum pressure arising from the Pauli exclusion principle [1, 2]. It can be calculated from the Fermi-Dirac distribution function at low temperature scenario. In *d* dimensions, the equation of state is , where is a function of spin and dimension for fermions. This pressure term is the one that appears in the hydrodynamic equation. Using the approximation to the quantum hydrodynamics, it corresponds to an effective potential of the form in the Gross-Pitaevskii equation. In particular, in dimensions, the pressure is leading to a potential and to a GP equation [1].

where is the sumation of columb potential energy, disorder potential and the external source-drain voltage.

We see that the Pauli exclusion principle for fermions, equivalent to a interaction () plays a role similar to the (quartic) self-interaction of bosons (). Indeed, the self-interaction is equivalent to an interparticle repulsion that dominates over the uncertainty pressure for . Similarly, in the case of fermions, the exclusion pressure dominates over the uncertainty pressure for .

We note that the potential associated with fermions becomes equivalent to the potential associated with self-coupled bosons when . In fact, the dimension is a critical dimension [1, 2]. This is a manifestation of the boson-fermion duality in two dimension.

**2. Numerical Scheme**We use the pseudo-spectral method to solve the GP equation on the 2D plane [3]. Let be the kinetic energy operator ( in Fourier space) and ***W*** the potential operator ( in real space). The evolution is then split into

On the other hand, we need to consider the noncommutative relation between ***K*** and ***W***, where

It follows that we obtain, to the second-order accuracy,

which will be adopted to advance the time steps.

For each time step, the kinetic energy operator is calculated in the Fourier domain,

and is advanced in real space with the potential energy operator,

To ensure numerical stability, we restrict the magnitude of dt that rotates the phase angle of wave function less than in each time step.

1. **Brief Summary**

In this supplement we consider the equation of state of the cold electron system serves as adiabatic gases by the quantum pressure due to Pauli exclusion principle. For the two dimensional case, such a many-body electron system coincides with a quantum fluid governed by a two dimensional, mean-field Gross-Pitaevskii equation. Under this scenario, the idea is interesting, simple and easy to be carried out by numerical calculation. The theoretical conjecture and the numerical result are consistent with our experimental study on the electronic transport properties observed by low-temperature scanning gate microscopy (LT-SGM).

**References**

[1] P.-H. Chavanis, “Mass-radius relation of Newtonian self-gravitating Bose-Einstein condensates with short-range interactions. I. Analytical results.” *Physics Review D*, vol. 84, 043531, 2011.

[2] G. Manfredi and F. Haas, “Self-consistent fluid model for a quantum electron gas” *Physics Review B*, vol. 64, 075316, 2001.

[3] T. P. Woo and T. Chiueh, “High-resolution simulation on structure formation with extremely light bosonic dark matter” *The Astrophysical Journal*, vol.697, no. 1,850-861, 2009.

**The Movie**

The movie reveals the normalized charge density evolution in the region (*L* = 1000 nm *W* = 800 nm) from *I* = *I*0 to 950 *I*0. (https://www.youtube.com/watch?v=JW7-oEGsQJQ)
